# Supplementary material for: Phase behaviours of a cationic surfactant in deep eutectic solvents: from micelles to lyotropic liquid crystals
Source: Royal Society of Chemistry journal article supplement (doi:10.1039/c8cp00001h), 2018-01-01
Supplement: c8cp00001h1.pdf [file c8cp00001h1.pdf]

**Electronic Supplementary Information**  
**Phase behaviours of a cationic surfactant in deep eutectic solvents:**  
**from micelles to lyotropic liquid crystals**

Qintang Li,<sup>\*a</sup> Jiao Wang,<sup>b</sup> Nana Lei,<sup>b</sup> Minhao Yan,<sup>a</sup> Xiao Chen<sup>b</sup> and Xiu Yue<sup>\*c, d</sup>

<sup>a</sup> State Key Laboratory for Environment-Friendly Energy Materials, School of Material Science and Engineering, Southwest University of Science and Technology, Mianyang 621000, China

<sup>b</sup> Key Laboratory of Colloid and Interface Chemistry, Shandong University, Ministry of Education, Jinan 250100, China

<sup>c</sup> Laboratory of Environmental Sciences and Technology, Xinjiang Technical Institute of Physics & Chemistry, Chinese Academy of Sciences, Urumqi 830011, China

<sup>d</sup> Key Laboratory of Functional Materials and Devices for Special Environments, Chinese Academy of Sciences, Urumqi 830011, China

Corresponding authors:

Qintang Li

E-mail: liqintangwind@sina.com

Xiu Yue

E-mail: yuexiu@ms.xjb.ac.cn

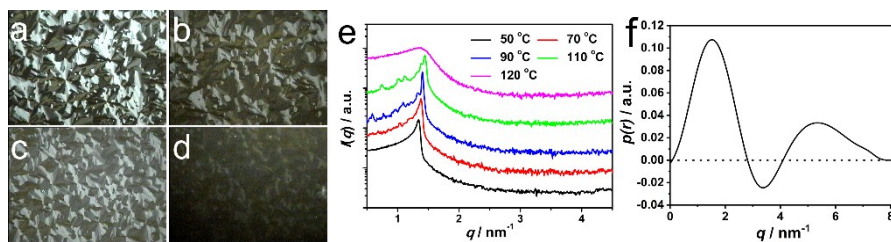

**Fig. S1** POM images (a-d) and SAXS curves (e) of  $H_1$  phases and in the 55 % CPBr/ChG system at different temperatures with corresponding PDDF curve at 120 °C.

**Table S1** Structure parameters of  $H_1$  phases in the 55 % CPBr/ChG system at different temperatures

| Temperature / °C | D / nm | R / nm | d / nm | S / nm <sup>2</sup> |
|------------------|--------|--------|--------|---------------------|
| 50               | 5.37   | 2.14   | 1.09   | 0.566               |
| 70               | 5.22   | 2.08   | 1.06   | 0.582               |
| 90               | 5.15   | 2.05   | 1.05   | 0.591               |
| 110              | 4.99   | 1.99   | 1.01   | 0.609               |

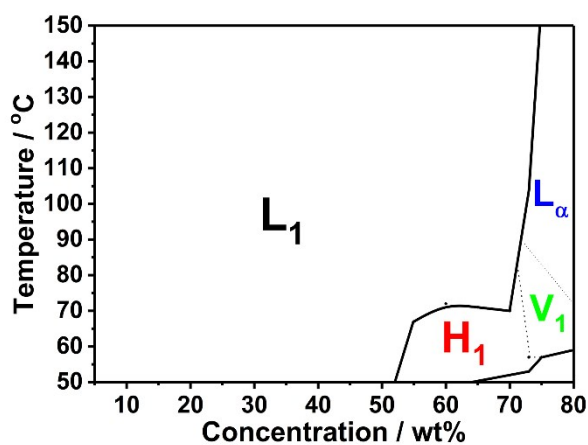

**Fig. S2** Phase diagram of the CPBr/ChEG system.

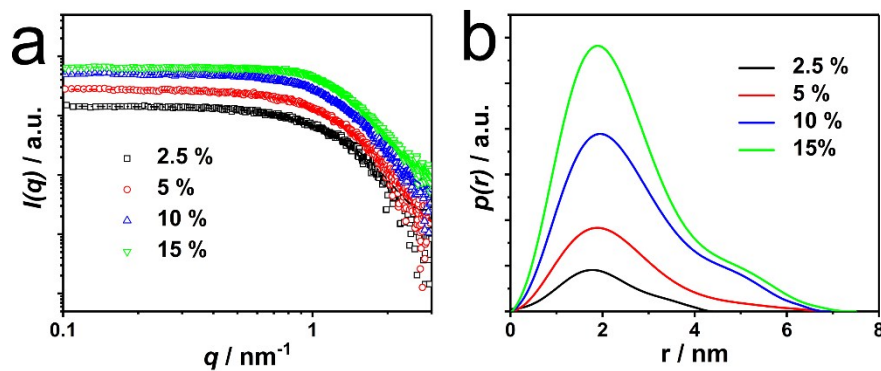

**Fig. S3** SAXS curves (a) and corresponding PPDF curves (b) of micelles in the CPBr/ChEG system at different concentrations at 50 °C. Open symbols for experimental curves and dash-dot lines for fitting curves.

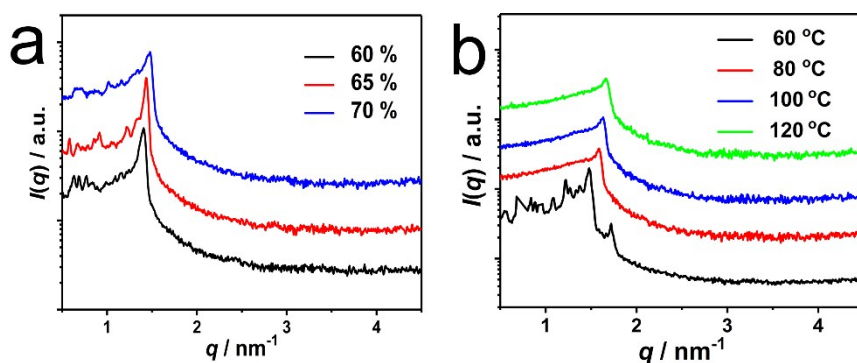

**Fig. S4** SAXS curves of CPBr/ChEG samples at 60 °C and different concentrations (a) and at 80% and different temperatures (b).

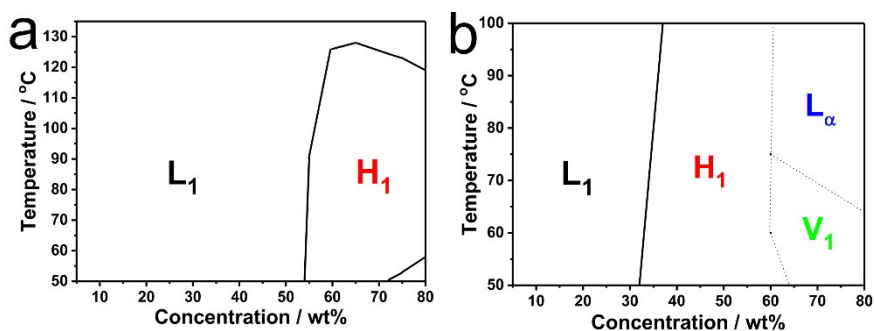

**Fig. S5** Phase diagrams of the CPBr/water (a) and CPBr/EAN (b) system.

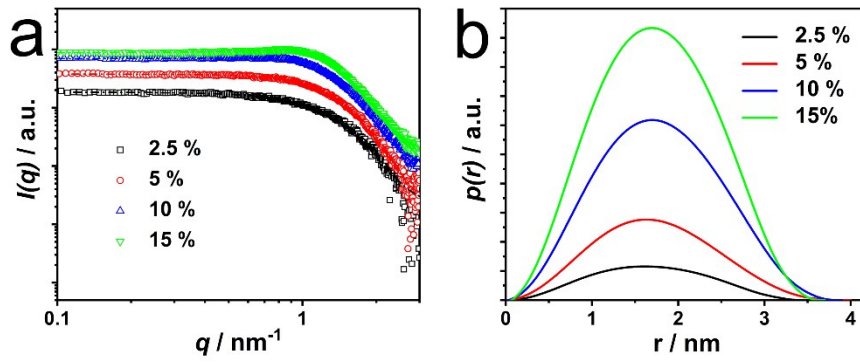

**Fig. S6** SAXS curves (a) and corresponding PPDF curves (b) of micelles in the CPBr/EAN system at different concentrations at 50 °C. Open symbols for experimental curves and dash-dot lines for fitting curves.

### Gordon parameter of DESs

The Gordon parameter  $G$  is calculated by S-1,

$$G = \gamma / \sqrt[3]{V_m} \quad (\text{S-1})$$

where  $\gamma$  is the air-liquid interface tension and  $V_m$  is the molar volume.

The molar volume  $V_m$  is calculated using S-2,

$$V_m = M_r / \rho \quad (\text{S-2})$$

where  $\rho$  is the density and  $M_r$  is the relative molar mass of the liquid calculated from

$$M_r = x_{ChCl} M_{ChCl} + x_{HBD} M_{HBD} \quad (\text{S-3})$$

where  $x$  is the molar ratio and  $M$  the relative molar mass of the two components.<sup>1</sup>

(20 °C,  $\gamma_{ChG}$ =55.8 mN/m,  $\rho_{ChG}$ =1.18g/cm<sup>3</sup>;  $\gamma_{ChEG}$ =49 mN/m,  $\rho_{ChEG}$ =1.12g/cm<sup>3</sup>)<sup>2</sup>

### References

1. A. P. Abbott, R. C. Harris, K. S. Ryder, C. D'Agostino, L. F. Gladden and M. D. Mantle, *Green Chem.*, 2011, **13**, 82.
2. A. P. Abbott, R. C. Harris and K. S. Ryder, *J. Phys. Chem. B*, 2007, **111**, 4910.
